# Supplementary material
Source: PubMed Central journal article supplement (PMC7964451)
Supplement: 3897_tables.pdf [file 3897_tables.pdf]

**On-line Table 1: Mean diffusivity indices of the WM skeletons across patients with HSP and the control group<sup>a</sup>**

|         | Patients with HSP (n = 12) | Healthy Controls (n = 12) | P Value <sup>b</sup> |
|---------|----------------------------|---------------------------|----------------------|
| Mean FA | 0.43 (0.45 ± 0.03)         | 0.49 (0.49 ± 0.02)        | <.001                |
| Mean RD | 6e-04 (6e-04 ± 5e-05)      | 5e-04 (5e-04 ± 2e-05)     | <.001                |
| Mean MD | 8e-04 (8e-04 ± 4e-05)      | 7e-04 (7e-04 ± 2e-05)     | .004                 |
| Mean AD | 1e-03 (1e-03 ± 4e-05)      | 1e-03 (1e-04 ± 7e-05)     | .01                  |

<sup>a</sup> Values are median and mean ± SD.

<sup>b</sup> Wilcoxon test.

**On-line Table 2: Significant clusters size, respectively, for FA, MD, and RD indices (P < .05, corrected)<sup>a</sup>**

| DTI Indices | Voxels | MAX   | Location of Maximum (mm) |     |     | Center of Gravity (mm) |       |      |
|-------------|--------|-------|--------------------------|-----|-----|------------------------|-------|------|
|             |        |       | x                        | y   | z   | x                      | y     | z    |
| FA          | 56376  | 0.998 | -45                      | -41 | -3  | -2.03                  | -11.9 | 14.1 |
| MD          | 16152  | 0.968 | -24                      | -63 | 11  | 5.87                   | -20.3 | 27.5 |
| RD          | 68014  | 0.999 | -45                      | -1  | -31 | 0.435                  | -21.2 | 9.72 |

**Note:**—MNI indicates Montreal Neurological Institute; MAX, maximum intensity value.

<sup>a</sup> MNI coordinates (in millimeters) for Location of Maximum and Center of Gravity are presented for each cluster.
